# Supplementary material
Source: PubMed Central journal article supplement (PMC4045617)
Supplement: NIHMS532756-supplement-Supp_Table_S1-S2___Fig_S1-S7.pdf [file NIHMS532756-supplement-Supp_Table_S1-S2___Fig_S1-S7.pdf]

## SUPPLEMENTAL EXPERIMENTAL PROCEDURES

### *Construction of strains*

Sequence data for *P. aeruginosa* PAO1 was obtained from the *Pseudomonas* Genome Database ([www.pseudomonas.com](http://www.pseudomonas.com)) (Stover et al., 2000; Winsor et al., 2011). Genomic DNA from PAO1 was prepared using the DNeasy Blood and Tissue Kit (Qiagen). All PCR fragments were gel purified using the Qiaex II Gel Extraction Kit (Qiagen).

All deletion mutants constructed in this study are unmarked, in-frame deletions of the genes and are produced by allelic exchange. The constructs used for allelic exchange were constructed as follows. The regions flanking the gene were produced by PCR of genomic PAO1 DNA using the UpF/UpR or DownF/DownR primer pairs (Table S2). These fragments were connected by SOE PCR and inserted into pDONRPEX18Gm using Gateway Technology (Invitrogen) to produce the deletion constructs. The deletion constructs were then mated into PAO1. Single recombination mutants were selected on VBMM agar (Vogel and Bonner, 1956) containing 100 µg/ml gentamicin or LB agar containing 100 µg/ml gentamicin and 25 µg/ml irgasan. To isolate double recombinants, strains were selected on LB without NaCl agar containing 10% sucrose and confirmed by PCR using the SeqF and SeqR primers (Table S2).

Chromosomally integrated fluorescent reporter strains were constructed using the mini-Tn7 system as previously described (Choi and Schweizer, 2006). For the mini-Tn7-compatible plasmids made in this study, plasmids containing *gfp* (pBT292) and the promoter regions (pBT244 and pBT323) were first made individually (see below) and then recombined into pUC18-miniTn7T2-Gm-GW using MultiSite Gateway Technology to create pBT331 and pBT332. For pBT292, *gfpmut3* was PCRred from pBK-miniTn7-

gfp (Lambertsen et al., 2004) using the gfp F/R primer pair and recombined into pDONR P1-P5r. For pBT244, QuikChange (Agilent Technologies) was used to introduce 65 random nucleotides into pDONR P5-P2 using the null promoter F/R primers. For pBT323, the promoter of *ibpA* was PCRed from MPAO1 using the *ibpA* promoter F/R primers and then recombined into pDONR P5-P2.

#### *Planktonic reporter assay*

Reporter strains were grown to log phase in Jensen's medium (Jensen et al., 1980) and diluted to  $10^8$  cells/ml in Jensen's medium containing 0 to 2  $\mu\text{g/ml}$  tobramycin. Samples were tested in triplicate using a 96-well microtiter plate. GFP fluorescence and growth (via  $\text{OD}_{600}$ ) for each condition was sampled every hour for 6 h using a Synergy Hybrid H1 Multi-mode Microplate Reader (Bio-Tek Instruments). To normalize the data, the GFP fluorescence was divided by the  $\text{OD}_{600}$  for each data point. This ratio was then divided by the ratio of the corresponding time point for the promoter-less GFP strain. The ratio at the zero time point was then subtracted. Finally, the resulting ratios of the triplicate samples were averaged.

#### *Planktonic control for MBEC viability assay*

Wells of a 96-well microtiter plate were inoculated with  $2 \times 10^6$  CFU in 10% TSB and challenged with a checkerboard arrangement of  $\text{MnSO}_4$  (0 – 20 mM) and tobramycin (0 – 0.25  $\mu\text{g/ml}$ ). The plates were incubated statically at  $37^\circ$  for 24 h. Cells were plated for viable cell counting as previously described (Harrison et al., 2010).

## SUPPLEMENTAL REFERENCES

- Choi, K.H., and Schweizer, H.P. (2006). mini-Tn7 insertion in bacteria with single attTn7 sites: example *Pseudomonas aeruginosa*. Nat Protoc 1: 153-161.
- Colvin, K.M., Gordon, V.D., Murakami, K., Borlee, B.R., Wozniak, D.J., Wong, G.C., and Parsek, M.R. (2011). The pel polysaccharide can serve a structural and protective role in the biofilm matrix of *Pseudomonas aeruginosa*. PLoS Pathog 7: e1001264.
- Friedman, L., and Kolter, R. (2004). Two genetic loci produce distinct carbohydrate-rich structural components of the *Pseudomonas aeruginosa* biofilm matrix. J Bacteriol 186: 4457-4465.
- Harrison, J.J., Stremick, C.A., Turner, R.J., Allan, N.D., Olson, M.E., and Ceri, H. (2010). Microtiter susceptibility testing of microbes growing on peg lids: a miniaturized biofilm model for high-throughput screening. Nat Protoc 5: 1236-1254.
- Jackson, K.D., Starkey, M., Kremer, S., Parsek, M.R., and Wozniak, D.J. (2004). Identification of psl, a locus encoding a potential exopolysaccharide that is essential for *Pseudomonas aeruginosa* PAO1 biofilm formation. J Bacteriol 186: 4466-4475.
- Jensen, S.E., Fecycz, I.T., and Campbell, J.N. (1980). Nutritional factors controlling exocellular protease production by *Pseudomonas aeruginosa*. J Bacteriol 144: 844-847.

- Lambertsen, L., Sternberg, C., and Molin, S. (2004). Mini-Tn7 transposons for site-specific tagging of bacteria with fluorescent proteins. *Environ Microbiol* 6: 726-732.
- Matsukawa, M., and Greenberg, E.P. (2004). Putative exopolysaccharide synthesis genes influence *Pseudomonas aeruginosa* biofilm development. *J Bacteriol* 186: 4449-4456.
- Stover, C.K., Pham, X.Q., Erwin, A.L., Mizoguchi, S.D., Warrenner, P., Hickey, M.J., *et al.* (2000). Complete genome sequence of *Pseudomonas aeruginosa* PAO1, an opportunistic pathogen. *Nature* 406: 959-964.
- Vogel, H.J., and Bonner, D.M. (1956). Acetylornithinase of *Escherichia coli*: partial purification and some properties. *J Biol Chem* 218: 97-106.
- Winsor, G.L., Lam, D.K., Fleming, L., Lo, R., Whiteside, M.D., Yu, N.Y., *et al.* (2011). *Pseudomonas* Genome Database: improved comparative analysis and population genomics capability for *Pseudomonas* genomes. *Nucleic Acids Res* 39: D596-600.
- Zhao, K., Tseng, B.S., Beckerman, B., Jin, F., Gibiansky, M.L., Harrison, J.J., *et al.* (in press). Psl exopolysaccharides control exploration and microcolony formation in early bacterial biofilms. *Nature*.

Table S1. Plasmids used in this study.

| PLASMIDS                            | Relevant characteristics                                                                                                                         | Source                     |
|-------------------------------------|--------------------------------------------------------------------------------------------------------------------------------------------------|----------------------------|
| pTNS2                               | T7 transposase expression vector                                                                                                                 | (Choi and Schweizer, 2006) |
| pBK-mini-Tn7- <i>rrnBP1-gfp</i> AGA | miniTn7 transposon with a short half-life allele of <i>gfp</i> driven by the <i>rrnBP1</i> promoter; Ap <sup>r</sup> , Gm <sup>r</sup>           | (Lambertsen et al., 2004)  |
| pBK-mini-Tn7- <i>gfp</i>            | miniTn7 transposon with <i>gfp</i> driven by the A1/04/03 promoter; Ap <sup>r</sup> , Gm <sup>r</sup>                                            | (Lambertsen et al., 2004)  |
| pUC18-miniTn7T2-Gm-GW               | GateWay compatible miniTn7 vector with attR1 and attR2 recombination sites and <i>ccdB</i> ; Ap <sup>r</sup> , Gm <sup>r</sup> , Cm <sup>r</sup> | (Zhao et al., in press)    |
| pDONR221 P1-P5r                     | GateWay compatible vector with attP1 and attP5r recombination sites and <i>ccdB</i> ; Kn <sup>r</sup> and Cm <sup>r</sup>                        | Invitrogen                 |
| pDONR221 P5-P2                      | GateWay compatible vector with attP5 and attP2 recombination sites and <i>ccdB</i> ; Kn <sup>r</sup> and Cm <sup>r</sup>                         | Invitrogen                 |
| pBT292                              | A GateWay compatible plasmid containing <i>gfpmut3</i> flanked by attR5 and attL1 recombination sites; Kn <sup>r</sup>                           | This study                 |
| pBT244                              | A GateWay compatible plasmid containing a random sequence of 65 nts flanked by attL2 and attL5 recombination sites; Kn <sup>r</sup>              | This study                 |
| pBT323                              | A GateWay compatible plasmid containing the <i>ibpA</i> promoter flanked by attL2 and attL5 recombination sites; Kn <sup>r</sup>                 | This study                 |
| pBT331                              | miniTn7 transposon with <i>gfp</i> driven by the <i>ibpA</i> promoter; Ap <sup>r</sup> , Gm <sup>r</sup>                                         | This study                 |
| pBT332                              | miniTn7 transposon with a promoterless <i>gfp</i> ; Ap <sup>r</sup> , Gm <sup>r</sup>                                                            | This study                 |
| pDONRPEX18Gm                        | A pEX18-based, GateWay-compatible suicide vector with attP1 and attP2 recombination sites and <i>ccdB</i> ; Gm <sup>r</sup> and Cm <sup>r</sup>  | Joe J. Harrison            |
| pBT341                              | pDONRPEX18Gm with <i>ndvB</i> deletion construct; Gm <sup>r</sup>                                                                                | This study                 |
| pBT342                              | pDONRPEX18Gm with <i>algD</i> deletion construct; Gm <sup>r</sup>                                                                                | This study                 |
| pBT343                              | pDONRPEX18Gm with <i>arr</i> deletion construct; Gm <sup>r</sup>                                                                                 | This study                 |
| pJJH228                             | pDONRPEX18Gm with <i>phoQ</i> deletion construct; Gm <sup>r</sup>                                                                                | This study                 |
| pJJH255                             | pDONRPEX18Gm with <i>brlR</i> deletion construct; Gm <sup>r</sup>                                                                                | This study                 |
| pJP362                              | pDONRPEX18Gm with PA0615 – PA0629 deletion construct; Gm <sup>r</sup>                                                                            | This study                 |
| pJJH279                             | pDONRPEX18Gm with <i>wbpL</i> deletion construct; Gm <sup>r</sup>                                                                                | Pradeep R. Singh           |
| pEX18Gm::Δ <i>peIF</i>              | pEX18Gm with <i>peIF</i> deletion construct; Gm <sup>r</sup>                                                                                     | (Colvin et al., 2011)      |

Ap, ampicillin; Cm, chloramphenicol; Gm, gentamicin; Kn, kanamycin

Table S2. Oligonucleotides used in this study.

| PRIMERS                  | Sequence                                                                                                                                                    |
|--------------------------|-------------------------------------------------------------------------------------------------------------------------------------------------------------|
| OBT339 (gfp F)           | GGGGACAACCTTTTGTATACAAAAGTTGTTTCGAAAATTAATACGACTCACTATAGGGAG<br>ACCACAACGGTTTCCCTCTAGAAATAATTTTGTTTAACTTTAAGAAGGAGATATATCCA<br>TGCGTAAAGGAGAAGAACCTTTTCACTG |
| OBT340 (gfp R)           | GGGGACAAGTTTGTACAAAAAAGCAGGCTCGTTACTTGTACAGCTCGTCCATGCC                                                                                                     |
| OBT383 (ibpA promoter F) | GGGGACAACCTTTGTATACAAAAGTTGCGGGCGAGGGAAAAAGCGTTGCTCATTG                                                                                                     |
| OBT384 (ibpA promoter R) | GGGGACCACTTTGTACAAGAAAGCTGGGTAGAAGGTCGGGATTGCGCGTTCCAT                                                                                                      |
| OBT296 (null promoter F) | ATGCCAACTTTGTATACAAAAGTTGCGTCACCTTTTCGCACTCCGCGAAAGTTCGTAC<br>CCGCGGACGGCTCTACCAGAACCAGCCTACCC                                                              |
| OBT297 (null promoter R) | GGGTAGGCTGTTCTGGTAGAGCCGTCCGCGGGTACGAACTTTGCGGAGTGCGAA<br>AAGGTGACGCAACTTTTGTATACAAAGTTGGCAT                                                                |
| OBT393 (algD UpF)        | GGGGACAAGTTTGTACAAAAAAGCAGGCTCACC GCCATGCATTCTGCAACTAGTG                                                                                                    |
| OBT394 (algD UpR)        | CTACCAGCAGATGCCCTCGGCGATGCTGATTTCGCATCGCATTAC                                                                                                               |
| OBT395 (algD DownF)      | GCCGAGGGCATCTGCTGGTAG                                                                                                                                       |
| OBT396 (algD DownR)      | GGGGACCACTTTGTACAAGAAAGCTGGGTACCTCGTCGGACATCTCGACGATG                                                                                                       |
| OBT399 (algD SeqF)       | AGCCCTTGTGGCGAATAG                                                                                                                                          |
| OBT400 (algD SeqR)       | GCTTGTGCCACTCGCTC                                                                                                                                           |
| OBT401 (arr UpF)         | GGGGACAAGTTTGTACAAAAAAGCAGGCTCAGGCCGAACGGGCAACAAGTTGTAAC                                                                                                    |
| OBT402 (arr UpR)         | CTAGCTCGCCGCTACGCGCGGCCTGCCGATCTGCATAG                                                                                                                      |
| OBT403 (arr DownF)       | CGCGTAGCGGCGAGCTAG                                                                                                                                          |
| OBT404 (arr DownR)       | GGGGACCACTTTGTACAAGAAAGCTGGGTAGCGCCGCGAAACCCTTTTACTG                                                                                                        |
| OBT407 (arr SeqF)        | CTGGAAGCCGGAAGATC                                                                                                                                           |
| OBT408 (arr SeqR)        | GCGATCCGCTGAACTG                                                                                                                                            |
| JJH1169 (briR UpF)       | GGGGACAAGTTTGTACAAAAAAGCAGGCTCAGTCATCTCGCTCACCAGG                                                                                                           |
| JJH1170 (briR UpR)       | GGCAAGCGCTGATTCACTAGATGGGCAGTTGGCCGATGGTGAGC                                                                                                                |
| JJH1171 (briR DownF)     | CCCCTACTGAATCAGCGC                                                                                                                                          |
| JJH1172 (briR DownR)     | GGGGACCACTTTGTACAAGAAAGCTGGGTACTACCTGGTGACCAAGCTG                                                                                                           |
| OBT385 (ndvB UpF)        | GGGGACAAGTTTGTACAAAAAAGCAGGCTCACATGGTCTCGCGGGTGACGAAATC                                                                                                     |
| OBT386 (ndvB UpR)        | GACCTCAACCGCCGATCTGCTCGAGCCCGATCTTGCCTGAAGACAT                                                                                                              |
| OBT387 (ndvB DownF)      | GAGCAGATCGGCGGTTGAGGTC                                                                                                                                      |
| OBT388 (ndvB DownR)      | GGGGACCACTTTGTACAAGAAAGCTGGGTAAAGGCGATGGCACCTTGTGCTC                                                                                                        |
| OBT391 (ndvB SeqF)       | GCGCGAGAAGTTGTAGTC                                                                                                                                          |
| OBT392 (ndvB SeqR)       | TTCGACCACCGCCTTG                                                                                                                                            |
| JJH1083 (phoQ UpF)       | GGGGACAAGTTTGTACAAAAAAGCAGGCTCCAAGTCCTTCCCGATCCTG                                                                                                           |
| JJH1084 (phoQ UpR)       | GTCTCAGACTGTAGCGAAACGTATGCGGATGCGCAGGGAACGGATC                                                                                                              |
| JJH1085 (phoQ DownF)     | CGCATACGTTTCGCTACAGTC                                                                                                                                       |
| JJH1086 (phoQ DownR)     | GGGGACCACTTTGTACAAGAAAGCTGGGTAGAATTGCAAGTCCTCGCGC                                                                                                           |
| JJH1187 (R2 pyocin SeqF) | GTCCCATGCACAGCAGCG                                                                                                                                          |
| JJH1188 (R2 pyocin SeqR) | GATAATGGCGGGCAACCAGG                                                                                                                                        |
| JJH1203 (wbpL UpF)       | GGGGACAAGTTTGTACAAAAAAGCAGGCTCCTTCGGCCGTTTGCTCAAG                                                                                                           |
| JJH1204 (wbpL UpR)       | CCAAGGAACCCGCTTGTATCCTACGACAACCTAGACACGCGATCATC                                                                                                             |
| JJH1205 (wbpL DownF)     | GTAGGATACAAGGCGGGTTC                                                                                                                                        |
| JJH1206 (wbpL DownR)     | GGGGACCACTTTGTACAAGAAAGCTGGGTAGCTCGGAGATGTCGGTTTG                                                                                                           |
| JJH1257 (wbpL SeqF)      | GCTGAAGCTTGTAAATGTGC                                                                                                                                        |
| JJH1258 (wbpL SeqR)      | CGACACAGCTCCTTAC                                                                                                                                            |

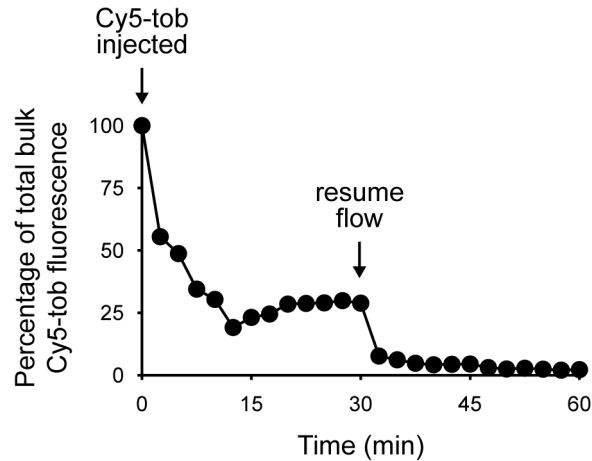

**Supplemental Figure S1. Cy5-tobramycin fluorescence in the bulk fluid.** Biofilms of a GFP-expressing PAO1 strain were treated statically with 20  $\mu\text{g/ml}$  Cy5-tobramycin for 30 min. Confocal laser scanning micrographs were acquired in the bulk fluid above the biofilm every 2.5 min during the static incubation and a subsequent 30-min wash. Average fluorescence for each time point was determined and divided by the peak fluorescence. A representative graph showing the remaining fluorescence versus time is shown. Time of Cy5-tobramycin injection and resumption of flow are marked by arrows.

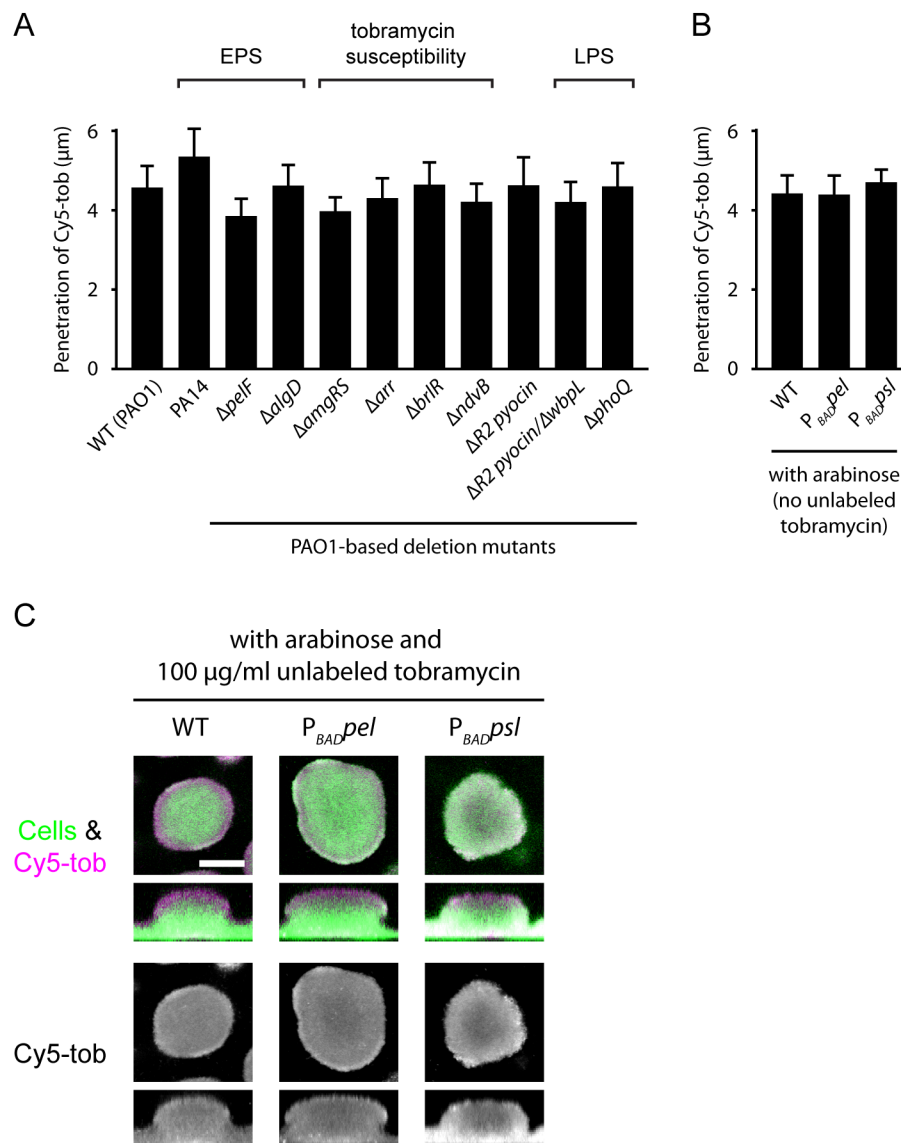

**Supplemental Figure S2. Mutants of biofilm matrix components and tobramycin susceptibility do not affect the penetration of tobramycin.** A and B. The average penetration of Cy5-tobramycin into biofilms. Biofilms were treated statically with 20 μg/ml Cy5-conjugated tobramycin for 30 min before imaging. The depth of penetration was determined using the z-slice containing the widest part of the biofilm. PA14, a strain that cannot produce Psl but produces a biofilm similar to wild-type PAO1, was used in place of a PAO1  $\Delta$ psI strain since Psl is required for biofilm formation in PAO1

(Friedman and Kolter, 2004; Jackson et al., 2004; Matsukawa and Greenberg, 2004).

The ability to produce R2 pyocin had to be removed in the  $\Delta wbpL$  strain because *wbpL* is essential in the presence of the self-produced toxin (J. Penterman and P. R. Singh, unpublished). Error bars represent one standard deviation. C. Biofilms of GFP-expressing wild type PAO1, PAO1 over-producing Pel ( $P_{BADpel}$ ), and PAO1 over-producing Psl ( $P_{BADpsl}$ ) were grown in the presence of 0.02% arabinose. Biofilms were treated statically with 20  $\mu\text{g/ml}$  Cy5-conjugated tobramycin and 100  $\mu\text{g/ml}$  unlabeled tobramycin for 30 min before imaging. Representative micrographs are displayed as in Figure 1. Bar, 50  $\mu\text{m}$ .

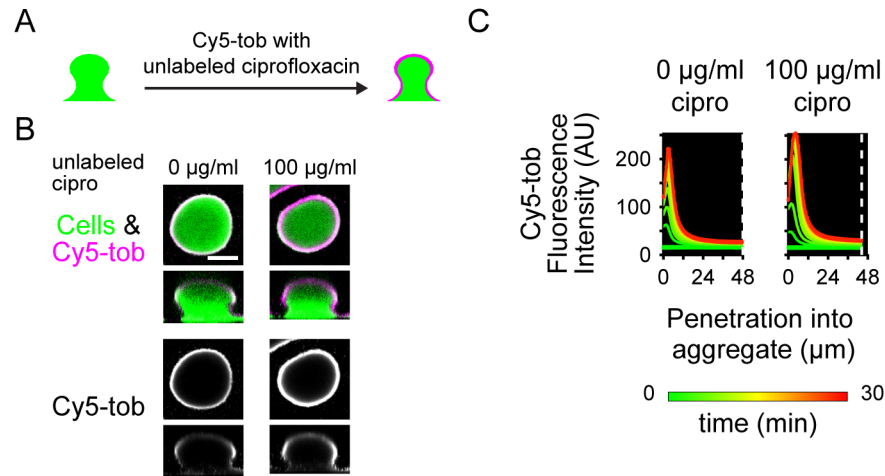

**Supplemental Figure S3. The limited penetration tobramycin is not affected by ciprofloxacin treatment.** Biofilms of a GFP-expressing PAO1 strain were treated statically with 20 µg/ml Cy5-tobramycin and 0 (control) or 100 µg/ml ciprofloxacin concurrently. Confocal laser scanning micrographs were acquired every 2.5 min during the 30-min static incubation. Representative micrographs are displayed as in Figure 1. Bar, 50 µm. B. Graphs, as described in Figure 2, representing the Cy5-tobramycin penetration kinetics.

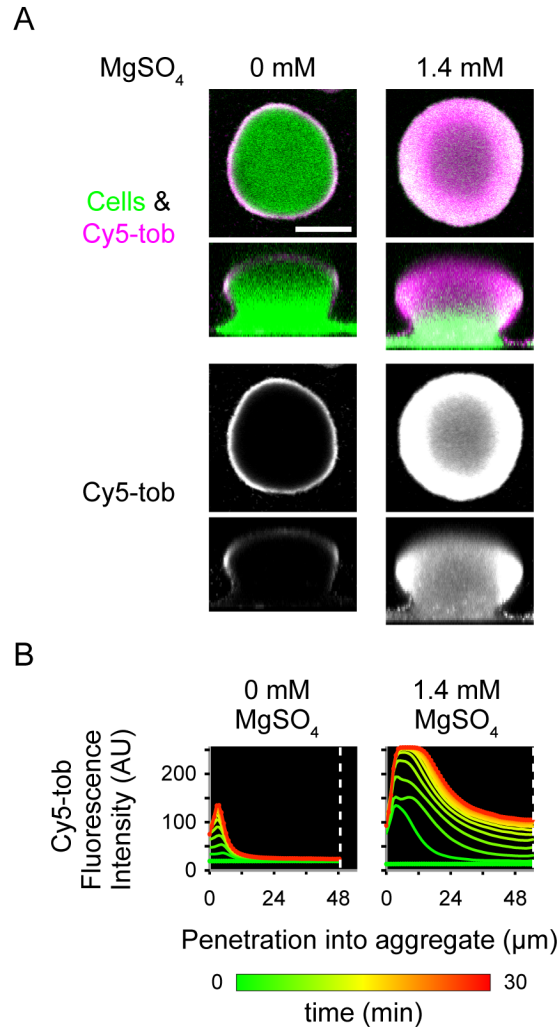

**Supplemental Figure S4. High concentrations of magnesium allow tobramycin to penetrate the biofilm.** Biofilms of a GFP-expressing PAO1 strain were treated statically with 20 μg/ml Cy5-tobramycin and 0 or 1.4 mM MgSO<sub>4</sub> concurrently. Confocal laser scanning micrographs were acquired every 2.5 min during the 30-min static incubation. A. Representative micrographs are displayed as in Figure 1. Bar, 50 μm. B. Graphs, as described in Figure 2, representing the Cy5-tobramycin penetration kinetics.

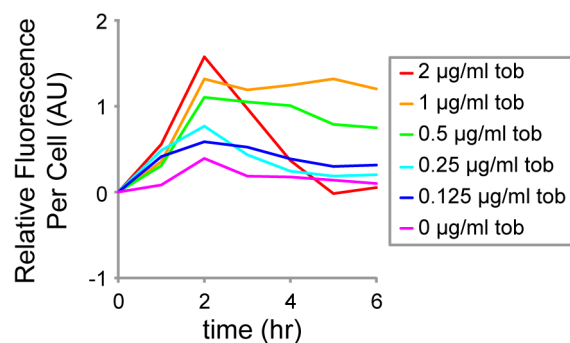

**Supplemental Figure S5. *ibpA* reporter responds to tobramycin in planktonic**

**culture.** Planktonic cultures of PAO1 Tn7::P<sub>*ibpA*</sub>*gfp* were treated with the indicated concentration of tobramycin. The GFP fluorescence and the OD<sub>600</sub> of the culture were measured every hour for 6 h. The y-axis represents a normalized relative fluorescence per cell (see Supplemental Methods and Materials). Samples were treated in triplicate and the experiment was repeated three times. A representative graph is shown. The fluorescence of the cells treated with 2 µg/ml tobramycin dropped after 2 h due to planktonic cell death (as indicated by a decrease in the OD<sub>600</sub>).

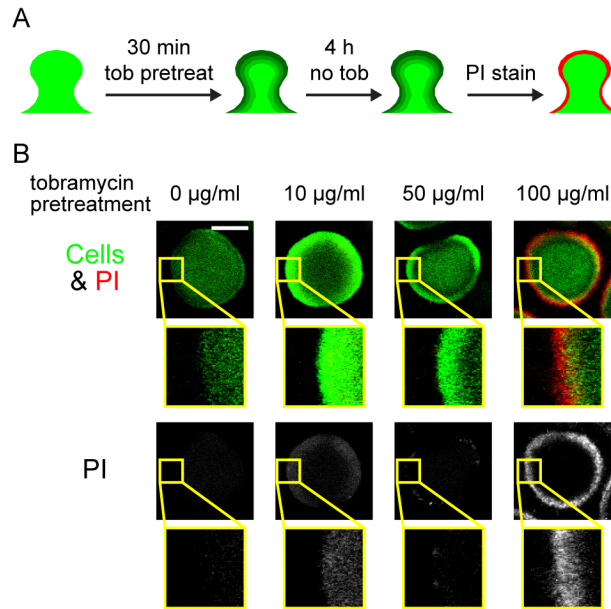

**Supplemental Figure S6. The penetration of the biofilm by a short, high dosage of tobramycin does not greatly affect cell viability.** A. Schematic of experiment.

Biofilms of PAO1 were treated with 0, 10, 50, or 100  $\mu\text{g/ml}$  tobramycin sulfate for 30 min followed by continuous media flow (no antibiotic treatment) for 4 h. Biofilms were then stained with propidium iodide for viability and then imaged. B. Representative micrographs are shown. In the top row, the biomass is pseudo-colored green and PI, red. The bottom row is PI alone in grayscale. Underneath each cross-sectional image is a 4.25x magnified region (inset yellow box). Bar, 50  $\mu\text{m}$ .

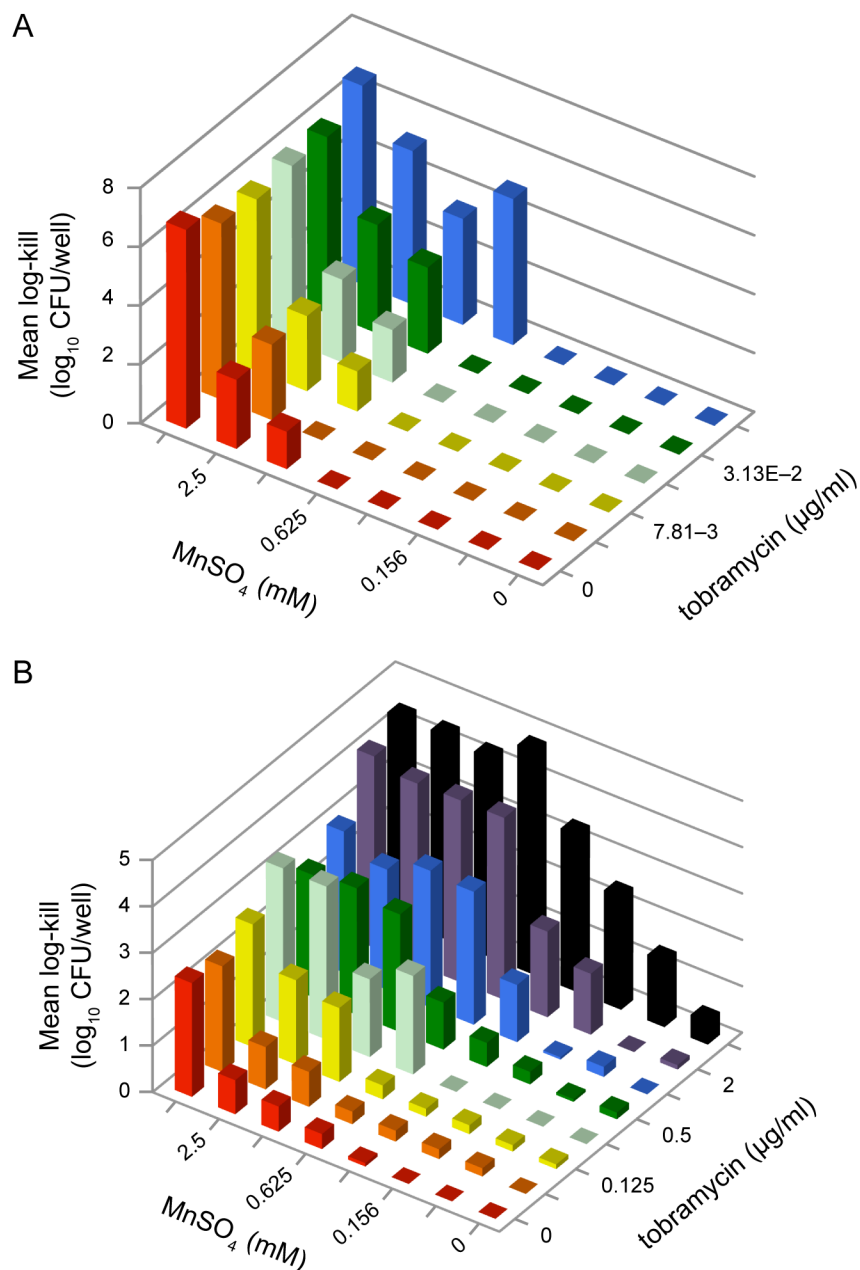

**Supplemental Figure S7. Greater synergistic killing of  $\text{MnSO}_4$  and tobramycin is observed in biofilm cells in comparison to planktonic cells.** Planktonic cells were grown in a 96 well plate (A) and biofilms were grown on polystyrene pegs (B). The cells were then challenged with various combinations of tobramycin and  $\text{MnSO}_4$ . Viable cell counts were determined by spot dilution plating. Mean log-kill was determined by

subtracting the final from the initial  $\log_{10}$ -transformed cell counts. At the end of the experiment, untreated growth control samples contained  $8.56 \pm 0.07$   $\log_{10}$ -transformed CFU per well for planktonic cells and  $5.47 \pm 0.41$   $\log_{10}$ -transformed CFU per peg for biofilm cells. Bars of the same color represent samples treated with the same concentration of tobramycin. Samples that did not grow or that grew (e.g. samples with mean log-kill values  $\leq 0$ ) are displayed as 0. The results represent the average of three independent trials.
